# Supplementary material for: Dynamic Basis Function Generation for Network Revenue Management
Source: Atypon-hosted journal article supplement (doi:10.1287/ijoc.2023.0418), 2025-12-08
Supplement: ijoc.2023.0418.sm1.pdf [file ijoc.2023.0418.sm1.pdf]

# Dynamic Basis Function Generation for Network Revenue Management

## Online Supplement

Daniel Adelman<sup>1</sup>, Christiane Barz<sup>2</sup>, Alba Olivares-Nadal<sup>3</sup>

<sup>1</sup>The University of Chicago Booth School of Business, <sup>2</sup>University of Zurich, <sup>3</sup>UNSW Business School

\* Address correspondence to: a.olivares\_nadal@unsw.edu.au

## A Proofs

### A.1 Proof of Proposition 1

Let  $(D_K)$  denote the dual problem with  $K$  basis functions. Let  $(D_{K+1})$  be the dual problem where a violated flow-balance constraint has been added; i.e.  $|\ell_t(\vec{\beta}_{K+1})| > 0$  and the following violated constraint for  $t$  has been added. Then, (D.FB) reads:

$$\sum_{(\vec{x}, \vec{u}) \in \mathcal{F}_t} \phi(\vec{x}; \vec{\beta}_{K+1}) \lambda_{t,(\vec{x}, \vec{u})} = \begin{cases} -\phi(\vec{c}; \vec{\beta}_{K+1}) & \text{if } t = 1 \\ \sum_{(\vec{x}, \vec{u}) \in \mathcal{F}_{t-1}} \left( \sum_{j=1}^J p_{j,t-1} \phi(\vec{x} - \vec{a}_j u_j; \vec{\beta}_{K+1}) \right. \\ \quad \left. + (1 - \sum_{j=1}^J p_{j,t-1}) \phi(\vec{x}; \vec{\beta}_{K+1}) \right) \lambda_{t-1,(\vec{x}, \vec{u})} & \text{otherwise.} \end{cases} \quad (\text{A.1})$$

Let  $\tilde{\Lambda}^K$  and  $\tilde{\Lambda}^{K+1}$  be the optimal solutions to  $(D_K)$  and  $(D_{K+1})$ , respectively. The solution  $\tilde{\Lambda}^K$  leads to  $|\ell_t(\vec{\beta}_{K+1})| > 0$  and hence violates (A.1). Thus,  $\tilde{\Lambda}^K$  is not a feasible solution for  $(D_{K+1})$ . In contrast,  $\tilde{\Lambda}^{K+1}$  is feasible to  $(D_K)$ . Because  $\tilde{\Lambda}^K$  is the unique and optimal solution to  $(D_K)$ ,

$$\sum_{t=1}^{\tau-1} \sum_{(\vec{x}, \vec{u}) \in \mathcal{F}_t} \tilde{\lambda}_{t,(\vec{x}, \vec{u})}^K \left\{ \sum_{j=1}^J p_{j,t} [f_j u_j + \psi_{t+1}(\vec{x} - \vec{a}_j u_j)] + \left( 1 - \sum_{j=1}^J p_{j,t} \right) \psi_{t+1}(\vec{x}) - \psi_t(\vec{x}) \right\}$$

$$\begin{aligned}
& + \sum_{(\vec{x}, \vec{u}) \in \mathcal{F}_\tau} \tilde{\lambda}_{\tau, (\vec{x}, \vec{u})}^K \left( \sum_{j=1}^J p_{j, \tau} f_j u_j - \psi_\tau(\vec{x}) \right) \\
\neq & \sum_{t=1}^{\tau-1} \sum_{(\vec{x}, \vec{u}) \in \mathcal{F}_t} \tilde{\lambda}_{t, (\vec{x}, \vec{u})}^{K+1} \left\{ \sum_{j=1}^J p_{j, t} [f_j u_j + \psi_{t+1}(\vec{x} - \vec{a}_j u_j)] + \left( 1 - \sum_{j=1}^J p_{j, t} \right) \psi_{t+1}(\vec{x}) - \psi_t(\vec{x}) \right\} \\
& + \sum_{(\vec{x}, \vec{u}) \in \mathcal{F}_\tau} \tilde{\lambda}_{\tau, (\vec{x}, \vec{u})}^{K+1} \left( \sum_{j=1}^J p_{j, \tau} f_j u_j - \psi_\tau(\vec{x}) \right)
\end{aligned}$$

Because the feasible region of  $(D_{K+1})$  does not contain  $\tilde{\lambda}^K$ , the optimal objective value of  $(D_{K+1})$  is (strictly) smaller than that of  $(D_K)$ . Strong duality then implies that linearized (AP) with the new variables  $V_{t, K+1}$  and new basis function  $\phi(\vec{x}, \vec{\beta}_{K+1})$  reduces the previous upper bound.

## A.2 Proof of Theorem 1

The following lemma is essential for proving Theorem 1.

**Lemma 1.** *For any value function approximation  $v(\vec{x}) = \xi_t + \psi_t(\vec{x}) + \sum_{k=1}^K V_{t, k} \phi(\vec{x}; \vec{\beta}_k)$  and any dual variables  $\lambda_{t, (\vec{x}, \vec{u})} \geq 0$  the following decomposition applies*

$$\begin{aligned}
\Xi(\xi; \lambda) + \Psi(\lambda) + \Phi(V, \vec{\beta}; \lambda) = & \sum_{t=1}^{\tau} \sum_{(\vec{x}, \vec{u}) \in \mathcal{F}_t} \lambda_{t, (\vec{x}, \vec{u})} \left\{ \tilde{v}_t(\vec{x}) - \left\{ \sum_{j=1}^J p_{t, j} [f_j u_j + \mathbf{1}_{\{t < \tau\}} \tilde{v}_{t+1}(\vec{x} - \vec{a}_j u_j)] \right. \right. \\
& \left. \left. + \left( 1 - \sum_{j=1}^J p_{t, j} \right) \mathbf{1}_{\{t < \tau\}} \tilde{v}_{t+1}(\vec{x}) \right\} \right\}, \tag{A.2}
\end{aligned}$$

where

$$\begin{aligned}
\Xi(\xi; \lambda) & := - \sum_{t=1}^{\tau} \sum_{(\vec{x}, \vec{u}) \in \mathcal{Q}_t(\lambda)} \lambda_{t, (\vec{x}, \vec{u})} \sum_{j=1}^J p_{t, j} f_j u_j + \xi_1, \\
\Psi(\lambda) & := \sum_{t=1}^{\tau} \sum_{(\vec{x}, \vec{u}) \in \mathcal{Q}_t(\lambda)} \lambda_{t, (\vec{x}, \vec{u})} \left\{ \psi_t(\vec{x}) - \left[ \sum_{j=1}^J p_{t, j} \mathbf{1}_{\{t < \tau\}} \psi_{t+1}(\vec{x} - \vec{a}_j u_j) + \left( 1 - \sum_{j=1}^J p_{t, j} \right) \mathbf{1}_{\{t < \tau\}} \psi_{t+1}(\vec{x}) \right] \right\}, \\
\Phi(V, \vec{\beta}; \lambda) & := - \sum_{k=1}^K V_{1, k} \phi(\vec{c}; \vec{\beta}_k) - \sum_{t=2}^{\tau} \sum_{k=1}^K V_{t, k} \ell_t(\vec{\beta}_k; \lambda).
\end{aligned}$$

and  $\mathcal{Q}_t(\lambda) := \{(\vec{x}, \vec{u}) \in \mathcal{F}_t : \lambda_{t, \vec{x}, \vec{u}} > 0\}$ .

*Proof.* Introducing the set  $\mathcal{Q}_t(\tilde{\lambda}) := \{(\vec{x}, \vec{u}) \in \mathcal{F}_t : \tilde{\lambda}_{t, \vec{x}, \vec{u}} > 0\}$ , we can decompose the terms

in the right hand side of (A.2) as

$$\begin{aligned}
\Xi(\xi; \lambda) &= \sum_{t=1}^{\tau} \sum_{(\vec{x}, \vec{u}) \in \mathcal{Q}_t(\lambda)} \lambda_{t,(\vec{x}, \vec{u})} \left\{ \xi_t - \left\{ \sum_{j=1}^J p_{t,j} [f_j u_j + \mathbf{1}_{\{t < \tau\}} \xi_{t+1}] + \left( 1 - \sum_{j=1}^J p_{t,j} \right) \mathbf{1}_{\{t < \tau\}} \xi_{t+1} \right\} \right\} \\
&= - \sum_{t=1}^{\tau} \sum_{(\vec{x}, \vec{u}) \in \mathcal{Q}_t(\lambda)} \lambda_{t,(\vec{x}, \vec{u})} \sum_{j=1}^J p_{t,j} f_j u_j + \sum_{t=1}^{\tau} \sum_{(\vec{x}, \vec{u}) \in \mathcal{Q}_t(\lambda)} \lambda_{t,(\vec{x}, \vec{u})} (\xi_t - \mathbf{1}_{\{t < \tau\}} \xi_{t+1}) \\
&= - \sum_{t=1}^{\tau} \sum_{(\vec{x}, \vec{u}) \in \mathcal{Q}_t(\lambda)} \lambda_{t,(\vec{x}, \vec{u})} \sum_{j=1}^J p_{t,j} f_j u_j + \sum_{t=1}^{\tau} (\xi_t - \mathbf{1}_{\{t < \tau\}} \xi_{t+1}) \\
&= - \sum_{t=1}^{\tau} \sum_{(\vec{x}, \vec{u}) \in \mathcal{Q}_t(\lambda)} \lambda_{t,(\vec{x}, \vec{u})} \sum_{j=1}^J p_{t,j} f_j u_j + \xi_1, \\
\Psi(\lambda) &= \sum_{t=1}^{\tau} \sum_{(\vec{x}, \vec{u}) \in \mathcal{Q}_t(\lambda)} \lambda_{t,(\vec{x}, \vec{u})} \left\{ \psi_t(\vec{x}) - \left[ \sum_{j=1}^J p_{t,j} \mathbf{1}_{\{t < \tau\}} \psi_{t+1}(\vec{x} - \vec{a}_j u_j) + \left( 1 - \sum_{j=1}^J p_{t,j} \right) \mathbf{1}_{\{t < \tau\}} \psi_{t+1}(\vec{x}) \right] \right\}, \\
\Phi(V, \vec{\beta}; \lambda) &= \sum_{t=1}^{\tau} \sum_{(\vec{x}, \vec{u}) \in \mathcal{Q}_t(\lambda)} \lambda_{t,(\vec{x}, \vec{u})} \left\{ - \sum_{k=1}^K V_{t,k} \phi(\vec{x}; \vec{\beta}_k) - \left[ - \sum_{j=1}^J p_{t,j} \mathbf{1}_{\{t < \tau\}} \sum_{k=1}^K V_{t+1,k} \phi(\vec{x} - \vec{a}_j u_j; \vec{\beta}_k) \right. \right. \\
&\quad \left. \left. - \left( 1 - \sum_{j=1}^J p_{t,j} \right) \mathbf{1}_{\{t < \tau\}} \sum_{k=1}^K V_{t+1,k} \phi(\vec{x}; \vec{\beta}_k) \right] \right\} \\
&= - \sum_{t=1}^{\tau} \sum_{k=1}^K V_{t,k} \sum_{(\vec{x}, \vec{u}) \in \mathcal{Q}_t(\lambda)} \lambda_{t,(\vec{x}, \vec{u})} \phi(\vec{x}; \vec{\beta}_k) \\
&\quad + \sum_{t=1}^{\tau-1} \sum_{k=1}^K V_{t+1,k} \sum_{j=1}^J p_{t,j} \sum_{(\vec{x}, \vec{u}) \in \mathcal{Q}_t(\lambda)} \lambda_{t,(\vec{x}, \vec{u})} \phi(\vec{x} - \vec{a}_j u_j; \vec{\beta}_k) \\
&\quad + \sum_{t=1}^{\tau-1} \sum_{k=1}^K V_{t+1,k} \left( 1 - \sum_{j=1}^J p_{t,j} \right) \sum_{(\vec{x}, \vec{u}) \in \mathcal{Q}_t(\lambda)} \lambda_{t,(\vec{x}, \vec{u})} \phi(\vec{x}; \vec{\beta}_k) \\
&= - \sum_{k=1}^K V_{1,k} \sum_{(\vec{x}, \vec{u}) \in \mathcal{Q}_1} \lambda_{1,(\vec{x}, \vec{u})} \phi(\vec{x}; \vec{\beta}_k) - \sum_{t=2}^{\tau} \sum_{k=1}^{K^*} V_{t,k} \sum_{(\vec{x}, \vec{u}) \in \mathcal{Q}_t(\lambda)} \lambda_{t,(\vec{x}, \vec{u})} \phi(\vec{x}; \vec{\beta}_k) \\
&\quad + \sum_{t=2}^{\tau} \sum_{k=1}^K V_{t,k} \sum_{j=1}^J p_{t-1,j} \sum_{(\vec{x}, \vec{u}) \in \mathcal{Q}_{t-1}} \lambda_{t-1,(\vec{x}, \vec{u})} \phi(\vec{x} - \vec{a}_j u_j; \vec{\beta}_k) \\
&\quad + \sum_{t=2}^{\tau} \sum_{k=1}^K V_{t,k} \left( 1 - \sum_{j=1}^J p_{t-1,j} \right) \sum_{(\vec{x}, \vec{u}) \in \mathcal{Q}_{t-1}} \lambda_{t-1,(\vec{x}, \vec{u})} \phi(\vec{x}; \vec{\beta}_k) \\
&= - \sum_{k=1}^K V_{1,k} \sum_{(\vec{x}, \vec{u}) \in \mathcal{Q}_1} \lambda_{1,(\vec{x}, \vec{u})} \phi(\vec{x}; \vec{\beta}_k) - \sum_{t=2}^{\tau} \sum_{k=1}^K V_{t,k} \ell_t(\vec{\beta}_k; \lambda)
\end{aligned}$$

$$= - \sum_{k=1}^K V_{1,k} \phi(\vec{c}; \vec{\beta}_k) - \sum_{t=2}^{\tau} \sum_{k=1}^K V_{t,k} \ell_t(\vec{\beta}_k; \lambda).$$

□

We now proceed to prove Theorem 1. Using Lemma 1, complementary slackness yields

$$\begin{aligned} 0 &= \sum_{t=1}^{\tau} \sum_{(\vec{x}, \vec{u}) \in \mathcal{F}_t} \tilde{\lambda}_{t,(\vec{x}, \vec{u})} \left\{ \tilde{v}_t(\vec{x}) - \left\{ \sum_{j=1}^J p_{t,j} [f_j u_j + \mathbf{1}_{\{t < \tau\}} \tilde{v}_{t+1}(\vec{x} - \vec{a}_j u_j)] + \left( 1 - \sum_{j=1}^J p_{t,j} \right) \mathbf{1}_{\{t < \tau\}} \tilde{v}_{t+1}(\vec{x}) \right\} \right\} \\ &= \Xi(\tilde{\xi}; \tilde{\lambda}) + \Psi(\tilde{\lambda}) + \Phi(\tilde{V}, \tilde{\beta}; \tilde{\lambda}), \end{aligned} \quad (\text{A.3})$$

On the other hand, because  $\tilde{\lambda}_{t,(\vec{x}, \vec{u})} \geq 0$  and  $v_t^*(\vec{x}) \geq \sum_{j=1}^J p_{t,j} [f_j u_j + \mathbf{1}_{\{t < \tau\}} v_{t+1}^*(\vec{x} - \vec{a}_j u_j)] + \left( 1 - \sum_{j=1}^J p_{t,j} \right) \mathbf{1}_{\{t < \tau\}} v_{t+1}^*(\vec{x})$  for all  $(\vec{x}, \vec{u}) \in \mathcal{F}_t$ , we have that

$$\begin{aligned} 0 &\leq \sum_{t=1}^{\tau} \sum_{(\vec{x}, \vec{u}) \in \mathcal{F}_t} \tilde{\lambda}_{t,(\vec{x}, \vec{u})} \left\{ v_t^*(\vec{x}) - \left\{ \sum_{j=1}^J p_{t,j} [f_j u_j + \mathbf{1}_{\{t < \tau\}} v_{t+1}^*(\vec{x} - \vec{a}_j u_j)] + \left( 1 - \sum_{j=1}^J p_{t,j} \right) \mathbf{1}_{\{t < \tau\}} v_{t+1}^*(\vec{x}) \right\} \right\}. \\ &= \Xi(\xi^*; \tilde{\lambda}) + \Psi(\tilde{\lambda}) + \Phi(V^*, \vec{\beta}^*; \tilde{\lambda}) \end{aligned} \quad (\text{A.4})$$

where the equality comes from Lemma 1. Subtracting (A.3) from (A.4), yields

$$\begin{aligned} 0 &\leq \left[ \Xi(\xi^*; \tilde{\lambda}) + \Psi(\tilde{\lambda}) + \Phi(V^*, \vec{\beta}^*; \tilde{\lambda}) \right] - \left[ \Xi(\tilde{\xi}; \tilde{\lambda}) + \Psi(\tilde{\lambda}) + \Phi(\tilde{V}, \vec{\beta}; \tilde{\lambda}) \right] \\ &= \Xi(\xi^*; \tilde{\lambda}) - \Xi(\tilde{\xi}; \tilde{\lambda}) + \Phi(V^*, \vec{\beta}^*; \tilde{\lambda}) - \Phi(\tilde{V}, \vec{\beta}; \tilde{\lambda}) \\ &= \xi_1^* - \sum_{k=1}^{K^*} V_{1,k}^* \phi(\vec{c}; \vec{\beta}_k^*) - \left( \tilde{\xi}_1 - \sum_{k=1}^{\tilde{K}} \tilde{V}_{1,k} \phi(\vec{c}; \tilde{\beta}_k) \right) - \sum_{t=2}^{\tau} \sum_{k=1}^{K^*} V_{t,k}^* \ell_t(\vec{\beta}_k^*; \tilde{\lambda}) + \sum_{t=2}^{\tau} \sum_{k=1}^{\tilde{K}} \tilde{V}_{t,k} \ell_t(\tilde{\beta}_k; \tilde{\lambda}) \\ &= [v_1^*(\vec{c}) - \tilde{v}_1(\vec{c})] - \sum_{t=2}^{\tau} \sum_{k=1}^{K^*} V_{t,k}^* \ell_t(\vec{\beta}_k^*; \tilde{\lambda}). \end{aligned}$$

where the last equality holds due to  $\ell_t(\tilde{\beta}_k; \tilde{\lambda}) = 0$ . Since  $v_1^*(\vec{c}) - \tilde{v}_1(\vec{c}) < 0$  by assumption, we cannot have  $\ell_t(\vec{\beta}_k^*; \tilde{\lambda}) = 0$  for all  $t = 1, \dots, \tau$ ,  $k = 1, \dots, K^*$ . In fact, we need

$$- \sum_{t=2}^{\tau} \sum_{k=1}^{K^*} V_{t,k}^* \ell_t(\vec{\beta}_k^*; \tilde{\lambda}) \geq v_1^*(\vec{c}) - \tilde{v}_1(\vec{c}).$$

### A.3 Proof of Proposition 2

*Proof.* Using the convexity of  $g$ , we obtain

$$\phi(\lambda \vec{x} + (1 - \lambda) \vec{x}') = g(\vec{\beta}^\top (\lambda \vec{x} + (1 - \lambda) \vec{x}')) = g(\lambda \vec{\beta}^\top \vec{x} + (1 - \lambda) \vec{\beta}^\top \vec{x}')$$

$$\leq \lambda g(\vec{\beta}^\top \vec{x}) + (1 - \lambda)g(\vec{\beta}^\top \vec{x}') = \lambda\phi(\vec{x}) + (1 - \lambda)\phi(\vec{x}').$$

□

## A.4 Proof of Proposition 3

*Proof.* For given  $k$ , a lower bound of the basis function (7) can be found by solving

$$\min_{\vec{\beta}_k, \vec{x} \in \{0, 1, \dots, c_i\}^I} e^{-\sum_i \beta_{i,k} x_i} \quad \text{s.t.} \quad \sum_i c_i |\beta_{i,k}| = 1$$

Since the objective function is monotone decreasing in  $\sum_i \beta_{i,k} x_i$ , we can write this problem as

$$\max_{\vec{\beta}_k, \vec{x} \in \{0, 1, \dots, c_i\}^I} \sum_i \beta_{i,k} x_i \quad \text{s.t.} \quad \sum_i c_i |\beta_{i,k}| = 1$$

This objective function is monotone increasing in every  $x_i$  with  $\beta_{i,k} \geq 0$  and monotone decreasing in  $x_i$  given  $\beta_{i,k} < 0$ . Hence, the optimal value of the previous problem is upper bounded by the optimal objective of the following program

$$\max_{\vec{\beta}_k, \vec{x} \in \{0, 1, \dots, c_i\}^I} \sum_i \beta_{i,k} x_i \quad \text{s.t.} \quad \sum_i c_i \beta_{i,k} = 1, \quad \beta_{i,k} \geq 0 \quad \forall i = 1, \dots, I$$

Given the non-negativity constraint on the  $\vec{\beta}_k$  and the norm constraint, the objective is upper bounded as follows  $\sum_i \beta_{i,k} x_i \leq \sum_i \beta_{i,k} c_i = 1$ . Hence, a lower bound of the basis function (7) is given by  $e^{-1}$  as long as  $\vec{\beta}_k$  is constrained by (8). Similarly, an upper bound of  $e^1$  can be obtained. □

## B Additional Computational Results

| $L$                                      | $\tau$ | $c$ | CPU times |        |        |          | K           |          |
|------------------------------------------|--------|-----|-----------|--------|--------|----------|-------------|----------|
|                                          |        |     | SPLA      | NSEP   | AA     | H-2PIAlg | H-2PIAlg+AA | H-2PIAlg |
| <b>Hub-and-Spoke instances (H&amp;S)</b> |        |     |           |        |        |          |             |          |
| 2                                        | 20     | 3   | 15        | 18 498 | 66     | 6366     | 6432        | 32       |
|                                          | 50     | 8   | 30        | 1860   | 58     | 323 127  | 323 185     | 31       |
|                                          | 100    | 17  | 52        | 22 212 | 122    | 549 877  | 549 999     | 23       |
|                                          | 200    | 33  | 98        | †      | 116    | 539 171  | 539 287     | 12       |
|                                          | 500    | 83  | 508       | †      | 184    | 154      | 338         | 2        |
|                                          | 1000   | 165 | 2465      | †      | 185    | 360      | 545         | 2        |
| 3                                        | 20     | 2   | 18        | 20 980 | 304    | 113 962  | 114 266     | 43       |
|                                          | 50     | 6   | 36        | 1737   | 278    | 372 511  | 372 789     | 37       |
|                                          | 100    | 12  | 64        | 176    | 395    | 227 744  | 228 139     | 28       |
|                                          | 200    | 25  | 142       | †      | 371    | 350 985  | 351 356     | 20       |
|                                          | 500    | 62  | 841       | †      | 501    | 97 710   | 98 211      | 13       |
|                                          | 1000   | 124 | 5330      | †      | 481    | 496 545  | 497 026     | 12       |
| 5                                        | 20     | 2   | 196       | 17 151 | 794    | 130 191  | 130 985     | 42       |
|                                          | 50     | 4   | 220       | 4006   | 729    | 584 713  | 585 442     | 39       |
|                                          | 100    | 8   | 261       | 56 890 | 1045   | 601 360  | 602 405     | 38       |
|                                          | 200    | 17  | 402       | †      | 975    | 503 696  | 504 671     | 19       |
|                                          | 500    | 41  | 5800      | †      | 1315   | 434 145  | 435 460     | 15       |
|                                          | 1000   | 83  | †         | †      | 1239   | 534 326  | 535 565     | 13       |
| 10                                       | 20     | 1   | 49        | †      | 3090   | 203 039  | 206 129     | 37       |
|                                          | 50     | 2   | 97        | †      | 2774   | 473 233  | 476 007     | 15       |
|                                          | 100    | 5   | 179       | †      | 4566   | 380 178  | 384 744     | 18       |
|                                          | 200    | 9   | 471       | †      | 4270   | 498 801  | 503 071     | 16       |
|                                          | 500    | 23  | 7253      | †      | 5962   | 489 085  | 495 047     | 13       |
|                                          | 1000   | 45  | †         | †      | 5704   | 312 874  | 318 578     | 11       |
| 20                                       | 20     | 1   | 150       | †      | 19 263 | 544 595  | 563 858     | 19       |
|                                          | 50     | 2   | 327       | †      | 19 426 | 5208     | 24 634      | 1        |
|                                          | 100    | 2   | 507       | †      | 31 175 | 5317     | 36 492      | 2        |
|                                          | 200    | 5   | 984       | †      | 30 654 | 203 212  | 233 866     | 6        |
|                                          | 500    | 12  | †         | †      | 41 782 | 18 424   | 60 206      | 2        |
|                                          | 1000   | 24  | †         | †      | 40 914 | 359 286  | 400 200     | 5        |
| <b>Bus instances</b>                     |        |     |           |        |        |          |             |          |
| Simple (SBL)                             |        |     | 43        | 532    | 43     | 290 389  | 290 432     | 41       |
| Consecutive (CBL)                        |        |     | 14        | 218    | 18     | 552 779  | 552 797     | 60       |
| Realistic (RBL)                          |        |     | 3635      | †      | 19     | 57 978   | 57 997      | 16       |

Table 1: CPU times in seconds of SPLA, NSEP, AA, and H-2PIAlg with AA baseline for the hub-and-spoke and bus networks. For H-2PIAlg, we display both the times taken to merely enhance AA, and the times including the computation of the AA baseline (H-2PIAlg+AA column). The last set of columns display the optimality gap (UB vs LB) of H-2PIAlg and the number of exponential ridge basis functions for which the best policy was obtained.

To address the apparent inconsistency in instance (2,100,17), where NSEP’s estimated LB slightly exceeds its reported UB, we provide statistical evidence that this difference is plau-

sibly due to sampling variability. Specifically, we test whether the policy's true expected reward  $\mu$  exceeds the reported UB of 4744.31. The estimated mean reward is  $\bar{R} = 4745.98$ , based on 15,892 sample paths, with a standard error of 4.7458. Since the true variance is unknown and the underlying distribution may not be normal, we use a one-sided  $t$ -test to test the hypotheses:

$$H_0 : \mu \leq 4744.31$$

$$H_1 : \mu > 4744.31$$

The test statistic is:

$$t = \frac{4745.98 - 4744.31}{4.7458} \approx 0.3517$$

With  $n = 15892$  observations, the degrees of freedom are 15,891. The  $p$ -value associated with this test statistic is:

$$\text{p-value} = P(T > 0.3517) \approx 0.3623$$

This means the smallest significance level at which the null hypothesis would be rejected is  $\alpha = 0.3623$ . As this is well above conventional thresholds (e.g., 0.05), the observed difference is not statistically significant.

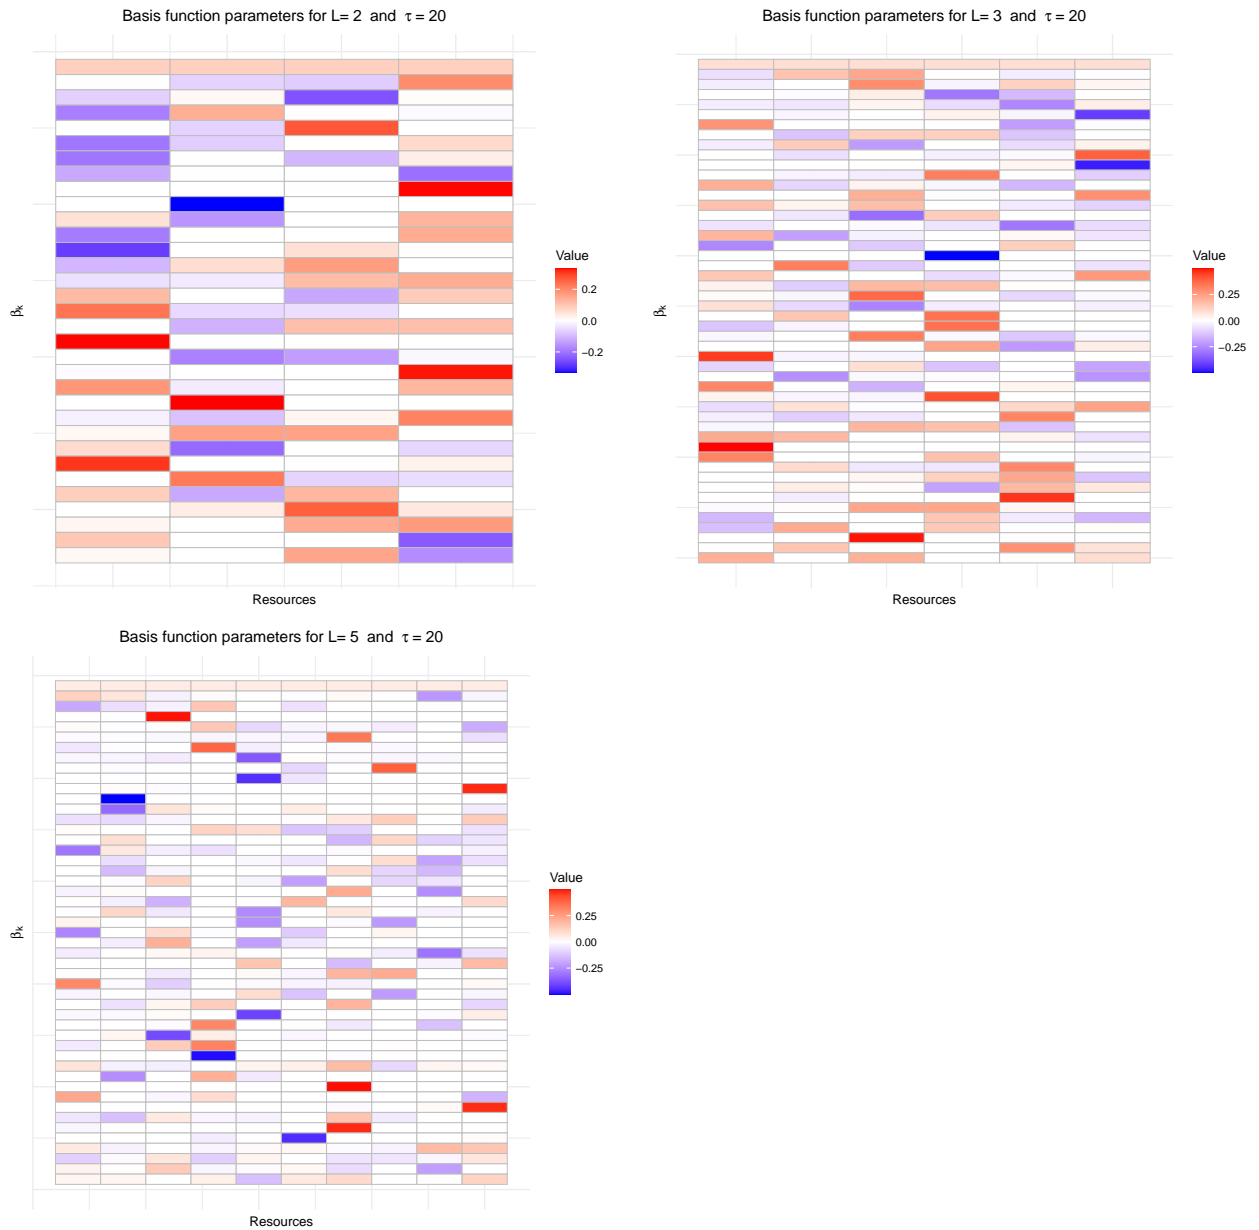

Figure 1: Heatmaps of the basis function parameters for instances in which H-2PIAlg outperforms NSEP in policy performance. Each plot has  $K$  rows, corresponding to the coefficient vector  $\beta_k$  of the  $k$ -th basis function, and  $I$  columns, each representing a resource. Red indicates a positive coefficient, while blue indicates a negative one. Color intensity reflects the magnitude of the coefficient.
